# Supplementary material
Source: Springer Nature journal article supplement (https://www.springermedizin.de/resource/supplementary/12943_2014_1354_MOESM1_ESM.pdf/9552792)

A

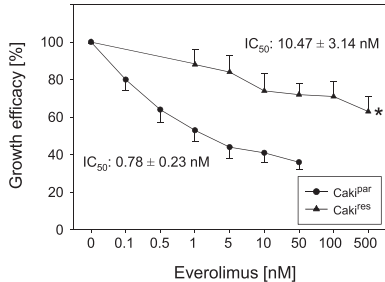

B

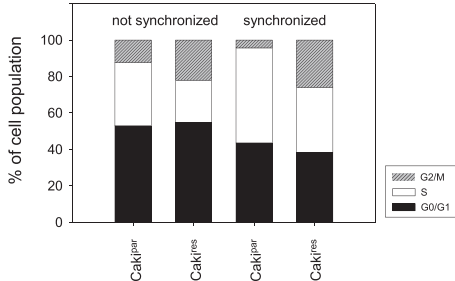

Supplement: MOESM1 [file 9552792]
